# Supplementary material for: A modular dCas9-SunTag DNMT3A epigenome editing system overcomes pervasive off-target activity of direct fusion dCas9-DNMT3A constructs
Source: PubMed Central journal article supplement — Genome Res. 2018 Aug;28(8):1193–206. doi: 10.1101/gr.233049.117 (PMC6071642; doi:10.1101/gr.233049.117), 2018-08
Supplement: supp_gr.233049.117_Supplemental_Fig_S1.pdf [file supp_gr.233049.117_Supplemental_Fig_S1.pdf]

## mCG/CG deposition after dC9Sun titration

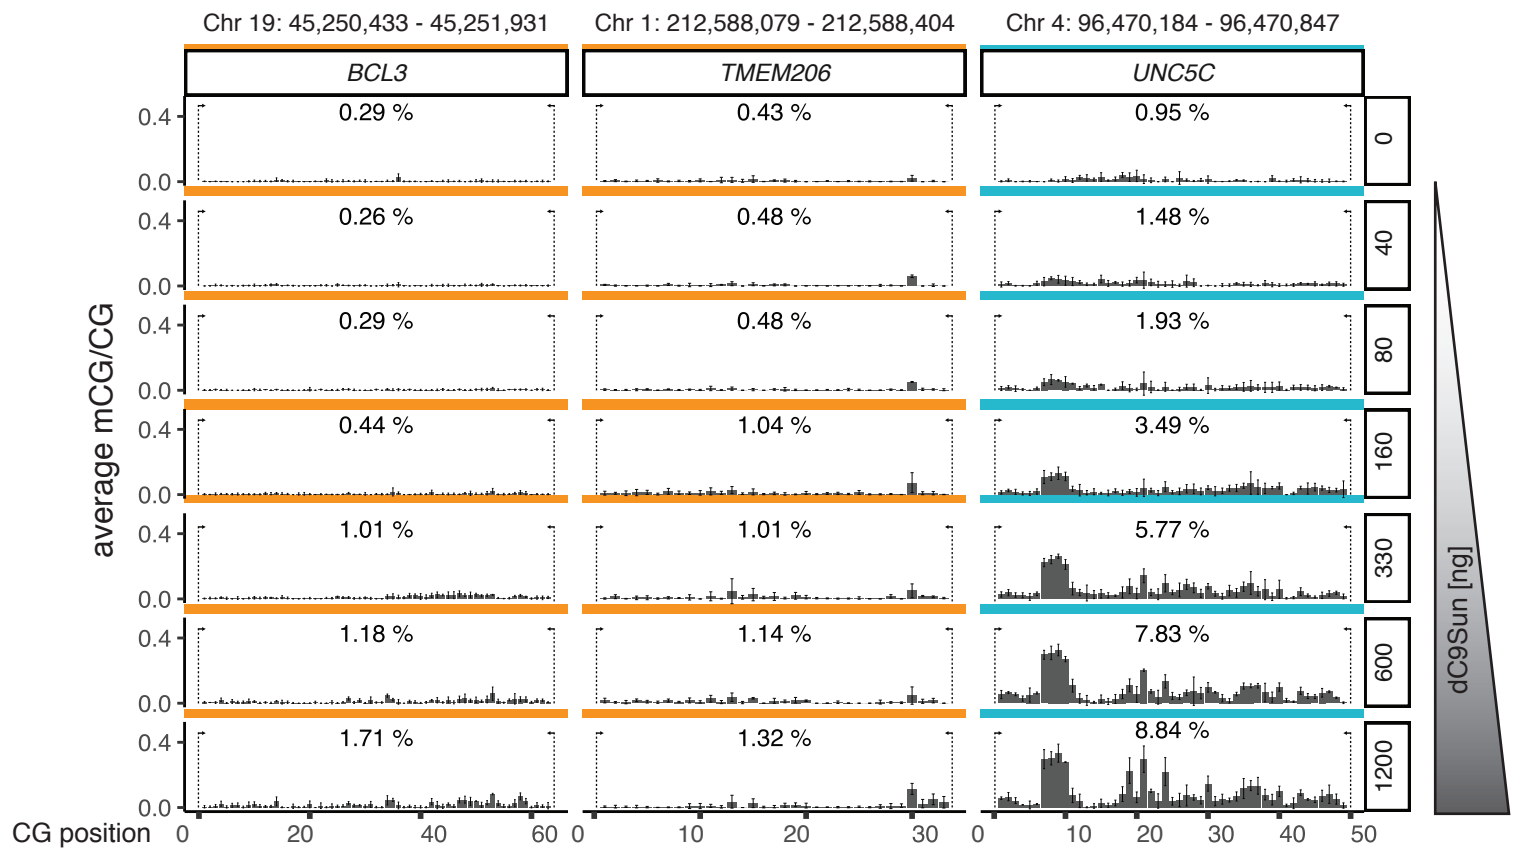

### Supplemental Figure S1: Characterizing on-target and off-target deposition after dC9Sun titration

Titration of dC9Sun (0-1200 ng) with a constant amount of  $\alpha$ GCN4-D3A effector (D3A - human DNMT3A catalytic domain, 40 ng). Fraction mCG is shown in black bars, sd - error bars, biological replicates n=3. On-target (*UNC5C* promoter) is highlighted in blue, off-target (*BCL3* promoter and *TMEM206* promoter) is highlighted in orange. Average gain in mCG is indicated as  $\Delta$  percent mCG/CG (baseline subtracted). CGs used for calculation are indicated by dotted lines. Cells were harvested at 48h post-transfection. No puromycin selection was performed since the resistance was linked to dC9Sun plasmid.
