# Supplementary material for: A modular dCas9-SunTag DNMT3A epigenome editing system overcomes pervasive off-target activity of direct fusion dCas9-DNMT3A constructs
Source: PubMed Central journal article supplement — Genome Res. 2018 Aug;28(8):1193–206. doi: 10.1101/gr.233049.117 (PMC6071642; doi:10.1101/gr.233049.117), 2018-08
Supplement: supp_gr.233049.117_Supplemental_Fig_S2.pdf [file supp_gr.233049.117_Supplemental_Fig_S2.pdf]

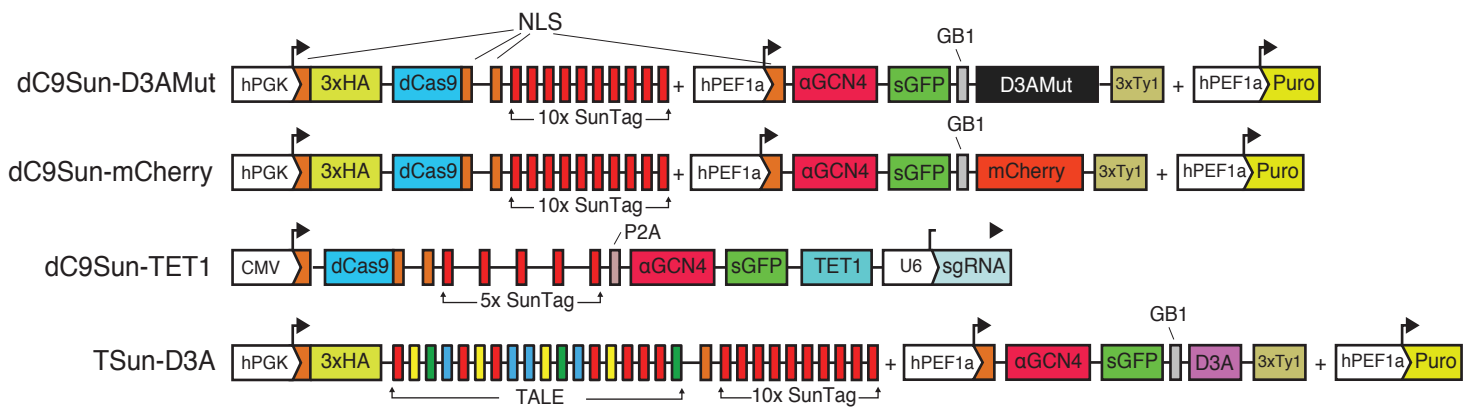

**Supplemental Figure S2:** Additional schematics of the dCas9 (dC9) and TALE (T) constructs used, indicating positioning of the nuclear localization sequences (NLS), protein tags (human influenza hemagglutinin - 3xHA, 3xTy1), promoter choice (glycerol kinase promoter - hPGK, human elongation factor-1 alpha promoter - hPEF1a), solubility tag (protein G B1 domain - GB1), selectable marker (puromycin resistance - puro), single-chain Fv antibody against GCN4 domain ( $\alpha$ GCN4), human DNTM3A catalytic domain (D3A), human DNTM3A catalytic mutant domain (D3AMut), red fluorescent protein (mCherry) and human Tet Methylcytosine Dioxygenase 1 (TET1). dC9Sun-TET1 was constructed by Morita *et al.*
