# Supplementary material for: A modular dCas9-SunTag DNMT3A epigenome editing system overcomes pervasive off-target activity of direct fusion dCas9-DNMT3A constructs
Source: PubMed Central journal article supplement — Genome Res. 2018 Aug;28(8):1193–206. doi: 10.1101/gr.233049.117 (PMC6071642; doi:10.1101/gr.233049.117), 2018-08
Supplement: supp_gr.233049.117_Supplemental_Fig_S3.pdf [file supp_gr.233049.117_Supplemental_Fig_S3.pdf]

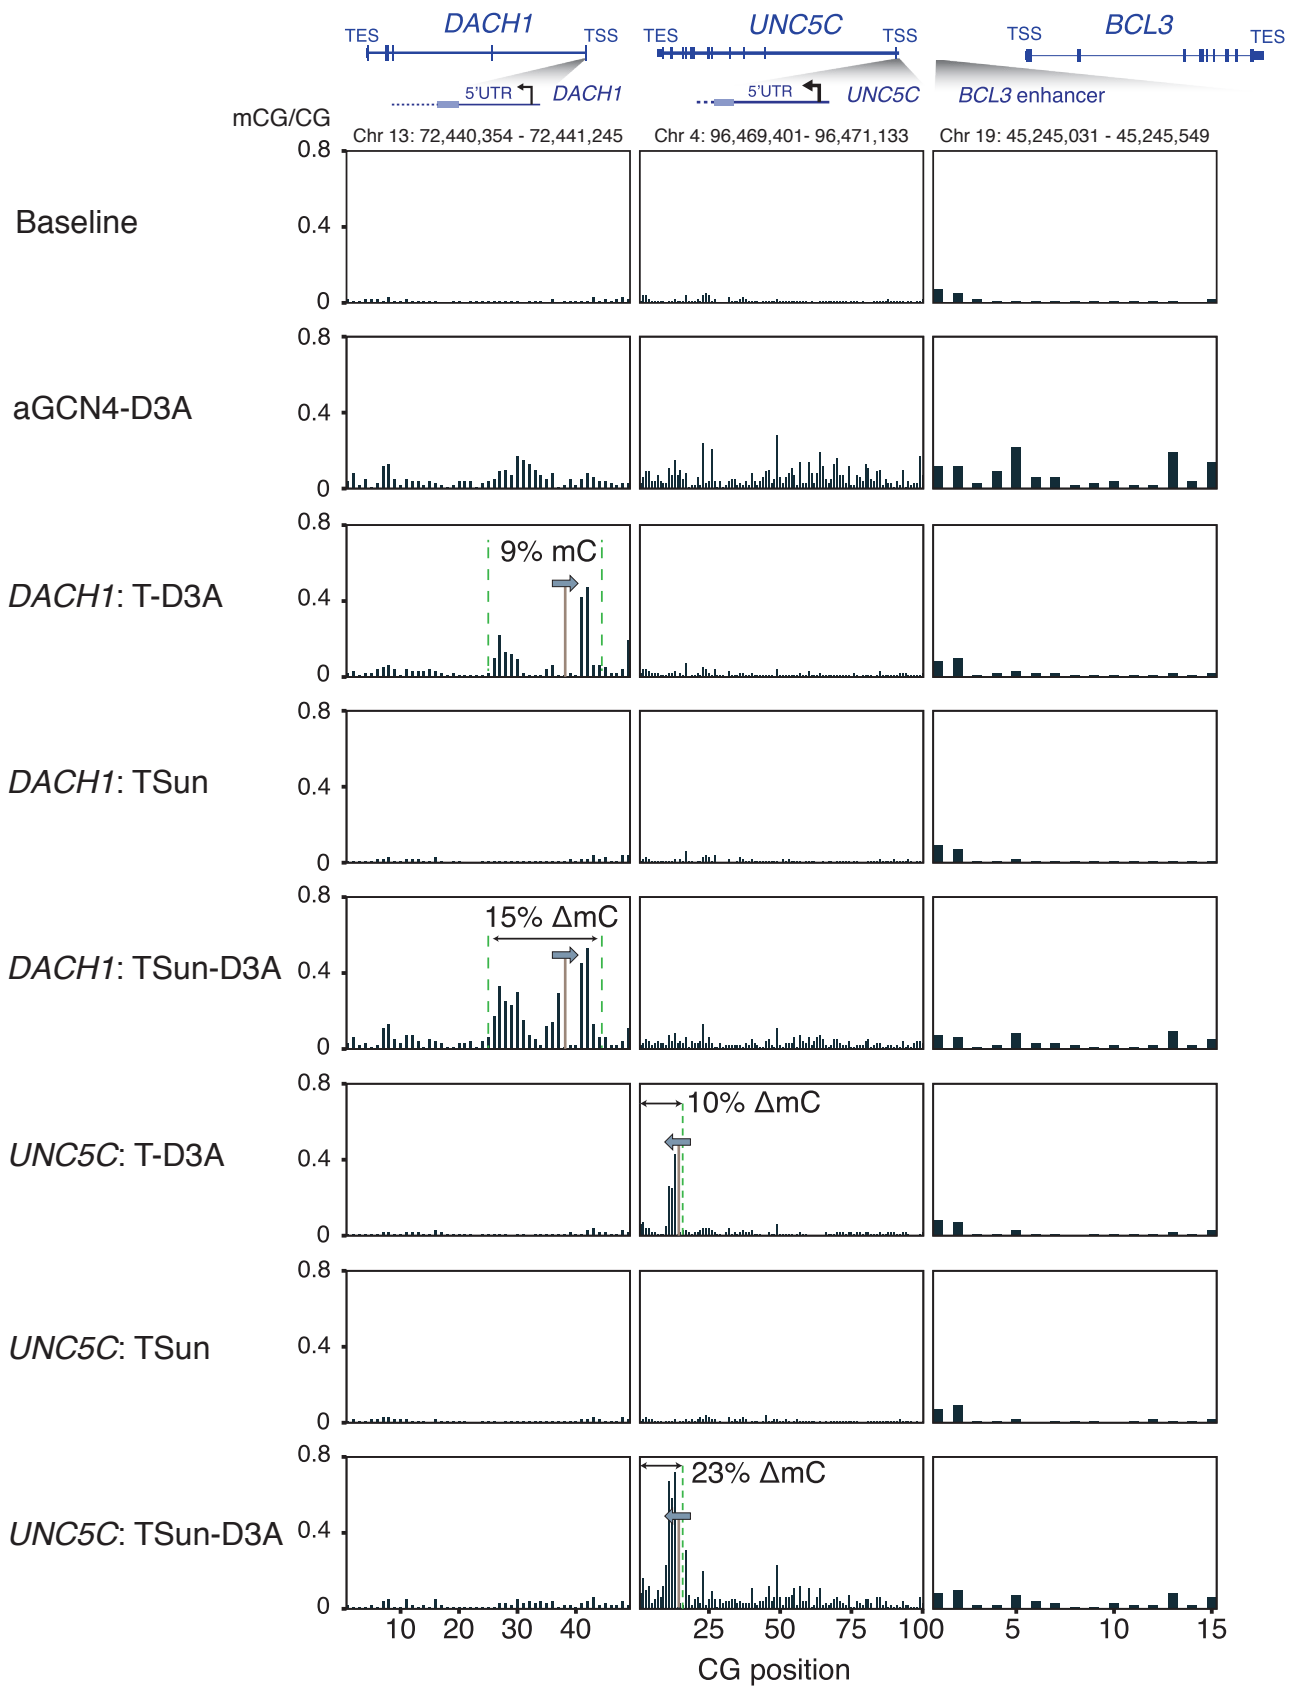

**Supplemental Figure S3: Characterizing on-target and off-target deposition of mCG by T-D3A**  
 Targeted mCG deposition to the *DACH1* or *UNC5C* promoters in MCF-7 cells by T-D3A and TSun-D3A, measured by bsPCR-seq (with *BCL3* enhancer used as off-target mCG assessment). Average gain in mCG is indicated as delta (baseline subtracted) %mCG. CGs used for calculation are indicated by dotted lines, TALE placement is indicated by grey arrow.
