# Supplementary material for: A modular dCas9-SunTag DNMT3A epigenome editing system overcomes pervasive off-target activity of direct fusion dCas9-DNMT3A constructs
Source: PubMed Central journal article supplement — Genome Res. 2018 Aug;28(8):1193–206. doi: 10.1101/gr.233049.117 (PMC6071642; doi:10.1101/gr.233049.117), 2018-08
Supplement: supp_gr.233049.117_Supplemental_Fig_S4.pdf [file supp_gr.233049.117_Supplemental_Fig_S4.pdf]

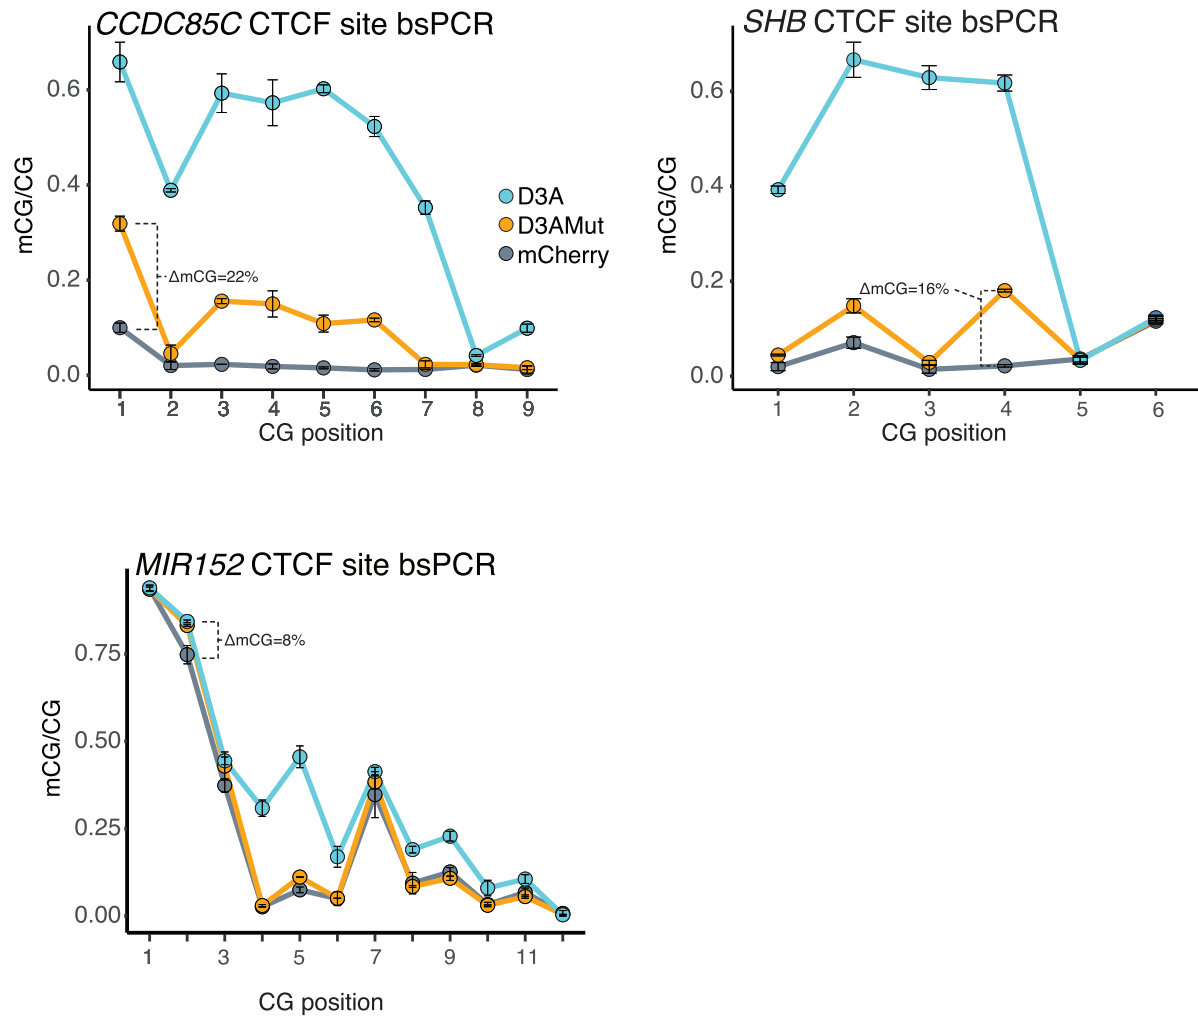

**Supplemental Figure S4:  $\alpha$ GCN4-D3AMut exhibits residual DNA methylation activity**

The DNMT3A mutant (FEER>AAAA) exhibits residual DNA methylation activity as measured by bsPCR-Seq (n=2 replicates, sd - error bars),  $\alpha$ GCN4-D3A (cyan line),  $\alpha$ GCN4-D3AMut (orange line) and  $\alpha$ GCN4-mCherry (gray line). The difference in mCG was calculated for each CG position, where the mCG level for puromycin-only treatment was subtracted from the mCG level for dC9Sun-D3AMut.
