# Supplementary material for: A modular dCas9-SunTag DNMT3A epigenome editing system overcomes pervasive off-target activity of direct fusion dCas9-DNMT3A constructs
Source: PubMed Central journal article supplement — Genome Res. 2018 Aug;28(8):1193–206. doi: 10.1101/gr.233049.117 (PMC6071642; doi:10.1101/gr.233049.117), 2018-08
Supplement: supp_gr.233049.117_Supplemental_Fig_S5.pdf [file supp_gr.233049.117_Supplemental_Fig_S5.pdf]

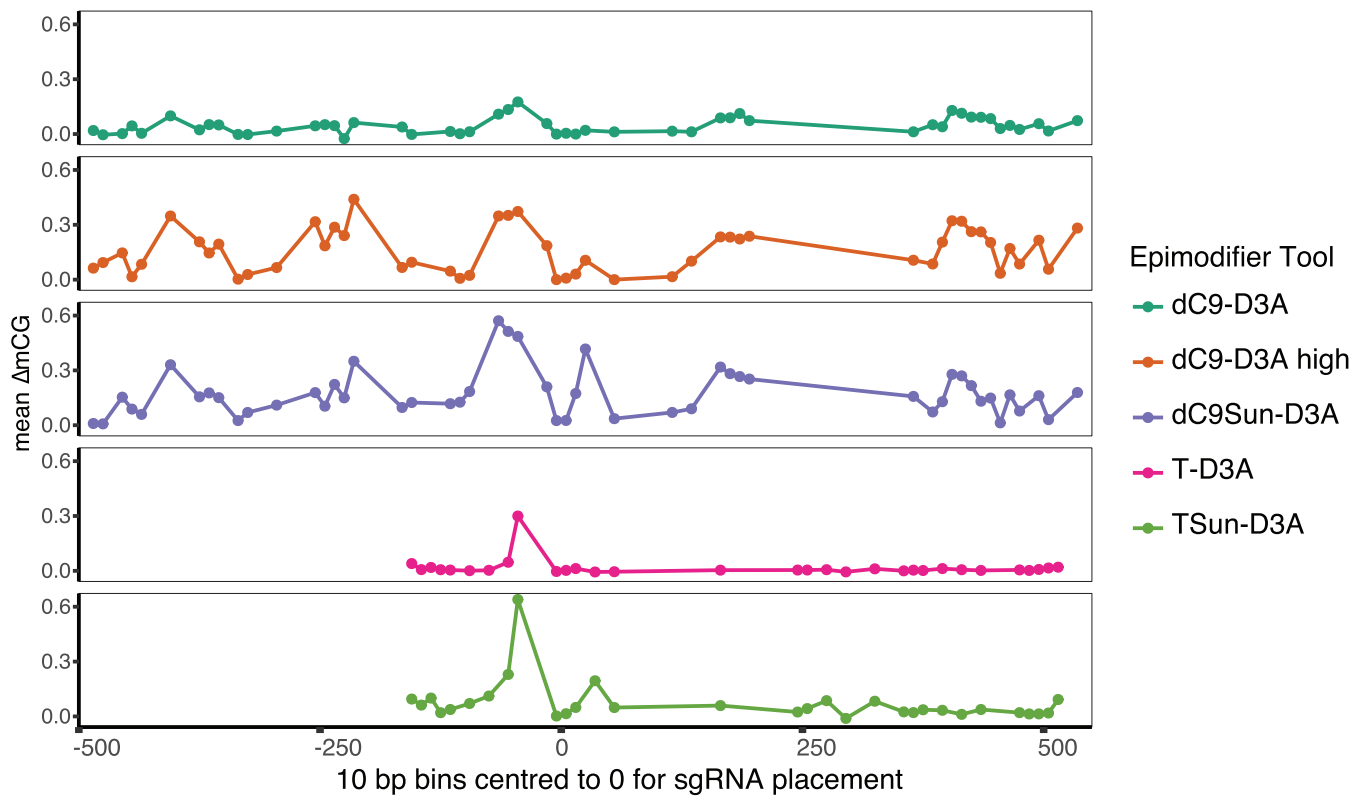

**Supplemental Figure S5: mCG deposition distance relative to dC9Sun-D3A binding at *UNC5C* promoter**

Distance of mCG deposition relative to binding of TALE or dCas9 at the *UNC5C* promoter, measured by bsPCR-Seq, background subtracted mCG/CG is shown for 10 bp bins upstream and downstream of the respective target site. Dots indicate the mean mCG/CG and the connecting lines indicate the absence of CGs in the corresponding bins.
