# Supplementary material for: A modular dCas9-SunTag DNMT3A epigenome editing system overcomes pervasive off-target activity of direct fusion dCas9-DNMT3A constructs
Source: PubMed Central journal article supplement — Genome Res. 2018 Aug;28(8):1193–206. doi: 10.1101/gr.233049.117 (PMC6071642; doi:10.1101/gr.233049.117), 2018-08
Supplement: supp_gr.233049.117_Supplemental_Fig_S6.pdf [file supp_gr.233049.117_Supplemental_Fig_S6.pdf]

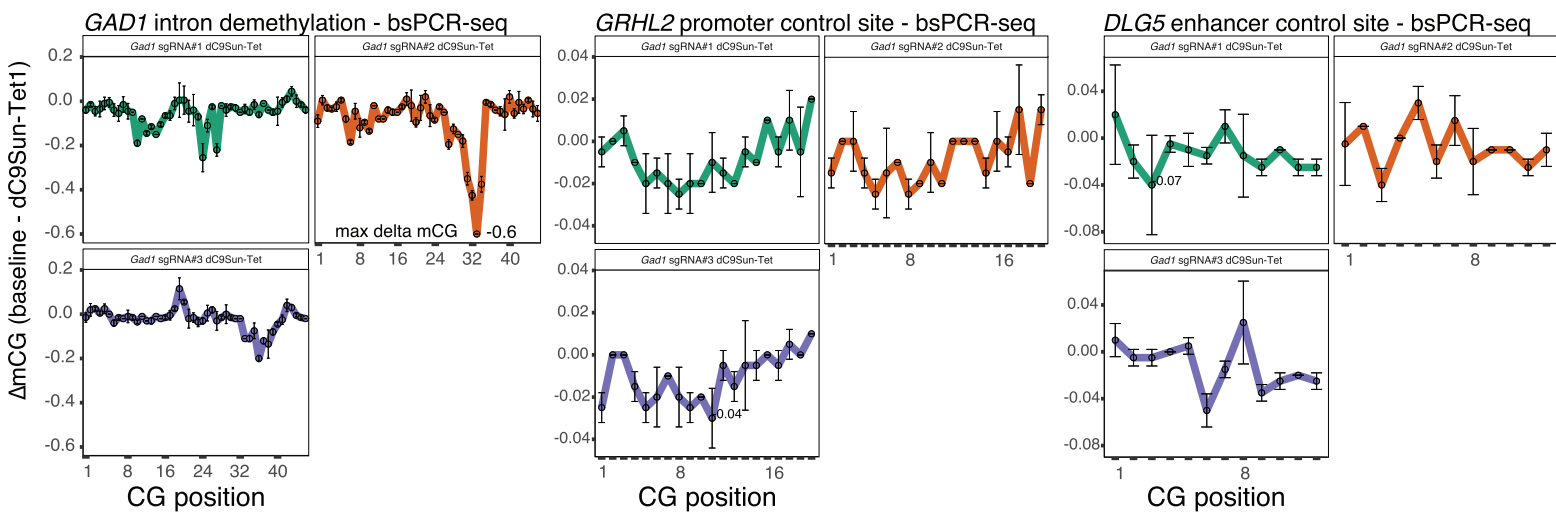

**Supplemental Figure S6: Targeted DNA demethylation by dC9Sun-TET1 at *GAD1* intron**

Targeted DNA demethylation by dC9Sun-TET1 at a *GAD1* intron, measured by targeted bsPCR-seq, off-target regions (*GRHL2* promoter and *DLG5* enhancer). y-axis:  $\Delta$  mCG puromycin treatment only - dC9Sun-Tet1 (*GAD1* sgRNA), n=2 replicates, sd - error bars).
