# Supplementary material for: A modular dCas9-SunTag DNMT3A epigenome editing system overcomes pervasive off-target activity of direct fusion dCas9-DNMT3A constructs
Source: PubMed Central journal article supplement — Genome Res. 2018 Aug;28(8):1193–206. doi: 10.1101/gr.233049.117 (PMC6071642; doi:10.1101/gr.233049.117), 2018-08
Supplement: supp_gr.233049.117_Supplemental_Fig_S7.pdf [file supp_gr.233049.117_Supplemental_Fig_S7.pdf]

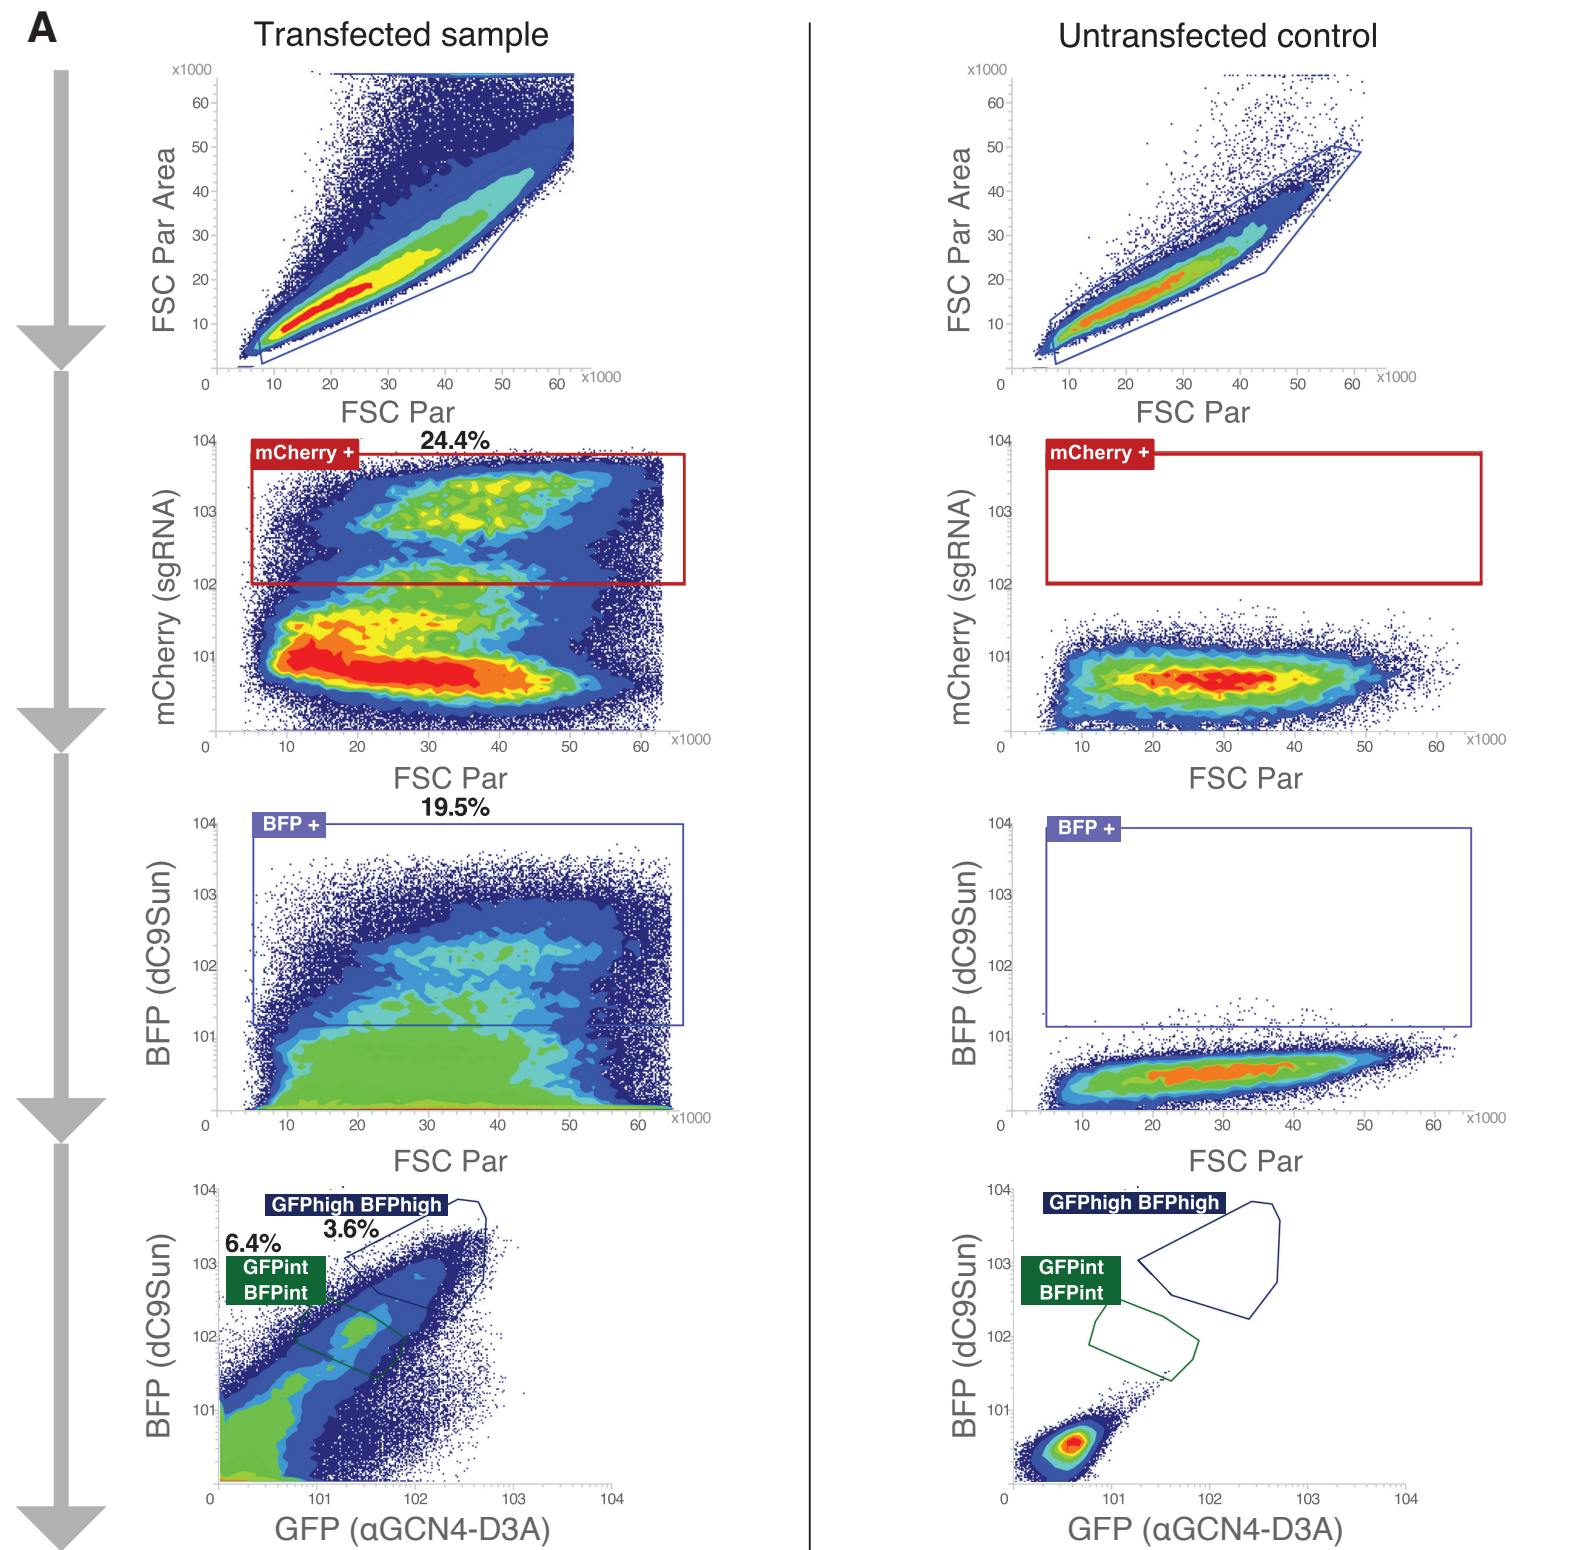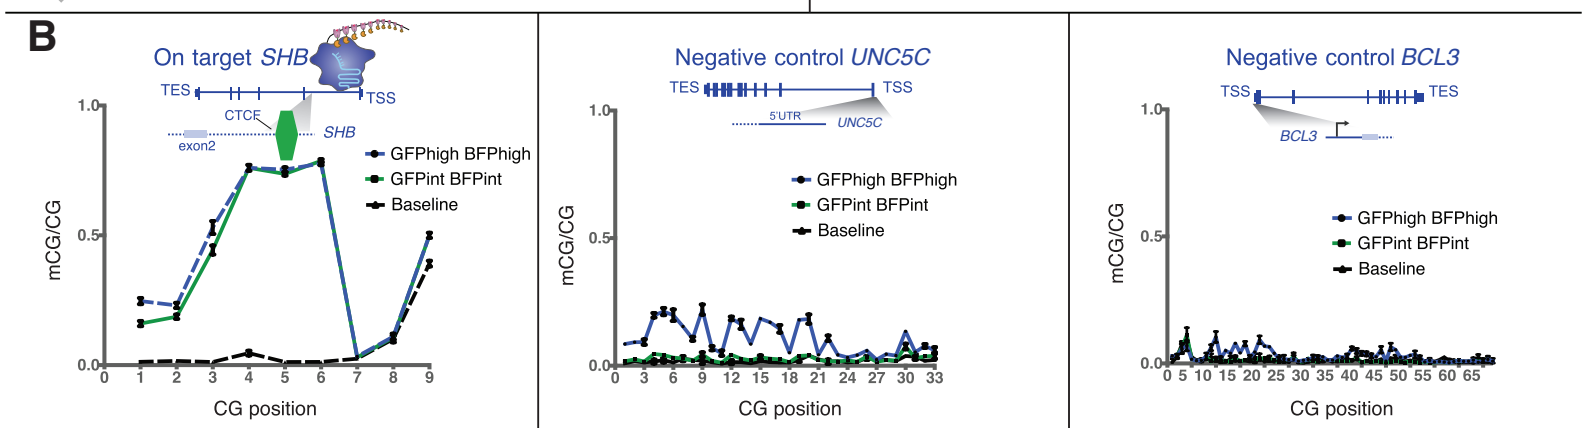

**Supplemental Figure S7: Flow cytometry selection criteria for enrichment of dC9Sun-D3A positive HeLa cells**

(A) HeLa cells were cell sorted and gated on mCherry positive (sgRNA) and BFP positive (dC9Sun), followed by double gating on GFP (αGCN4-D3A) and BFP. Finally, transfected HeLa cells were gated on GFP and BFP intensity (high intensity - blue gate, medium intensity - green gate). The intermediate GFP and BFP positive cells (GFPint and BFPint) were used for targeted bsPCR and TSC-BS-seq. (B) Targeted bsPCR-seq for the on-target SHB CTCF binding site and two off-target sites (UNC5C promoter and BCL3 promoter). GFPint and BFPint (green line) show high on-target and low off-target mCG efficiency. GFPhigh and BFPhigh (blue line) exhibit high off-target mCG at the UNC5C promoter and the BCL3 promoter (n=3 replicates, error bars show standard deviation).
