# Supplementary material for: A modular dCas9-SunTag DNMT3A epigenome editing system overcomes pervasive off-target activity of direct fusion dCas9-DNMT3A constructs
Source: PubMed Central journal article supplement — Genome Res. 2018 Aug;28(8):1193–206. doi: 10.1101/gr.233049.117 (PMC6071642; doi:10.1101/gr.233049.117), 2018-08
Supplement: supp_gr.233049.117_Supplemental_Fig_S8.pdf [file supp_gr.233049.117_Supplemental_Fig_S8.pdf]

| ChIP peak name       | ChIP peak height | Number of mismatches | sgRNA matched sequences at dCas9 binding sites |   |   |   |   |   |   |   |   |    |    |    |    |    |    | PAM |    |   |   |   |
|----------------------|------------------|----------------------|------------------------------------------------|---|---|---|---|---|---|---|---|----|----|----|----|----|----|-----|----|---|---|---|
|                      |                  |                      | 1                                              | 2 | 3 | 4 | 5 | 6 | 7 | 8 | 9 | 10 | 11 | 12 | 13 | 14 | 15 | 16  | 17 | 1 | 2 | 3 |
| <i>SHB</i> on-target | 7067             | 0                    | T                                              | G | T | G | C | T | A | A | A | C  | C  | T  | C  | C  | C  | G   | T  | T | G | G |
| Off-Target #1        | 124              | 3                    | G                                              | G | T | G | C | C | C | A | A | C  | C  | T  | C  | C  | C  | G   | T  | T | G | G |
| Off-Target #2        | 142              | 5                    | G                                              | C | A | C | T | T | A | A | A | C  | C  | T  | C  | C  | C  | G   | T  | T | G | G |
| Off-Target #3        | 160              | 6                    | G                                              | C | C | C | G | G | A | A | A | C  | C  | T  | C  | C  | C  | G   | T  | G | G | G |
| Off-Target #4        | 171              | 4                    | T                                              | C | T | C | T | G | A | A | A | C  | C  | T  | C  | C  | C  | G   | T  | T | G | G |
| Off-Target #5        | 262              | 5                    | A                                              | A | T | C | A | C | A | A | A | C  | C  | T  | C  | C  | C  | G   | T  | C | G | G |
| Off-Target #6        | 293              | 5                    | A                                              | G | C | T | G | T | T | A | A | C  | C  | T  | C  | C  | C  | G   | T  | C | G | G |
| Off-Target #7        | 296              | 6                    | G                                              | C | C | T | A | C | A | A | A | C  | C  | T  | C  | C  | C  | G   | T  | A | G | G |
| Off-Target #8        | 336              | 5                    | A                                              | C | T | A | A | G | A | A | A | C  | C  | T  | C  | C  | C  | G   | T  | G | G | G |
| Off-Target #9        | 489              | 6                    | C                                              | T | C | T | G | C | A | A | A | C  | C  | T  | C  | C  | C  | G   | T  | G | G | G |
| Off-Target #10       | 2860             | 2                    | T                                              | G | G | A | C | T | A | A | A | C  | C  | T  | C  | C  | C  | G   | T  | A | G | G |
| Off-Target #11       | 202              | 5                    | C                                              | C | T | A | G | G | A | A | A | C  | C  | T  | C  | C  | C  | G   | T  | C | G | G |
| Off-Target #12       | 129              | 6                    | A                                              | A | T | T | A | C | A | A | A | C  | C  | T  | C  | C  | C  | A   | T  | G | G | G |

**Supplemental Figure S8: dC9Sun-D3A off-target peak analysis of predicted SHB sgRNA homology to the genomic DNA**  
dCas9 off-target ChIP-seq peak analysis for the *SHB* sgRNA sequence homology, with the *SHB* sgRNA sequence reference highlighted in orange. Matching bases in blue, mismatches in white, matched PAM site (NGG) in light green for 'N' and in gray for 'GG' leaway
