# Supplementary material for: A modular dCas9-SunTag DNMT3A epigenome editing system overcomes pervasive off-target activity of direct fusion dCas9-DNMT3A constructs
Source: PubMed Central journal article supplement — Genome Res. 2018 Aug;28(8):1193–206. doi: 10.1101/gr.233049.117 (PMC6071642; doi:10.1101/gr.233049.117), 2018-08
Supplement: supp_gr.233049.117_Supplemental_Fig_S9.pdf [file supp_gr.233049.117_Supplemental_Fig_S9.pdf]

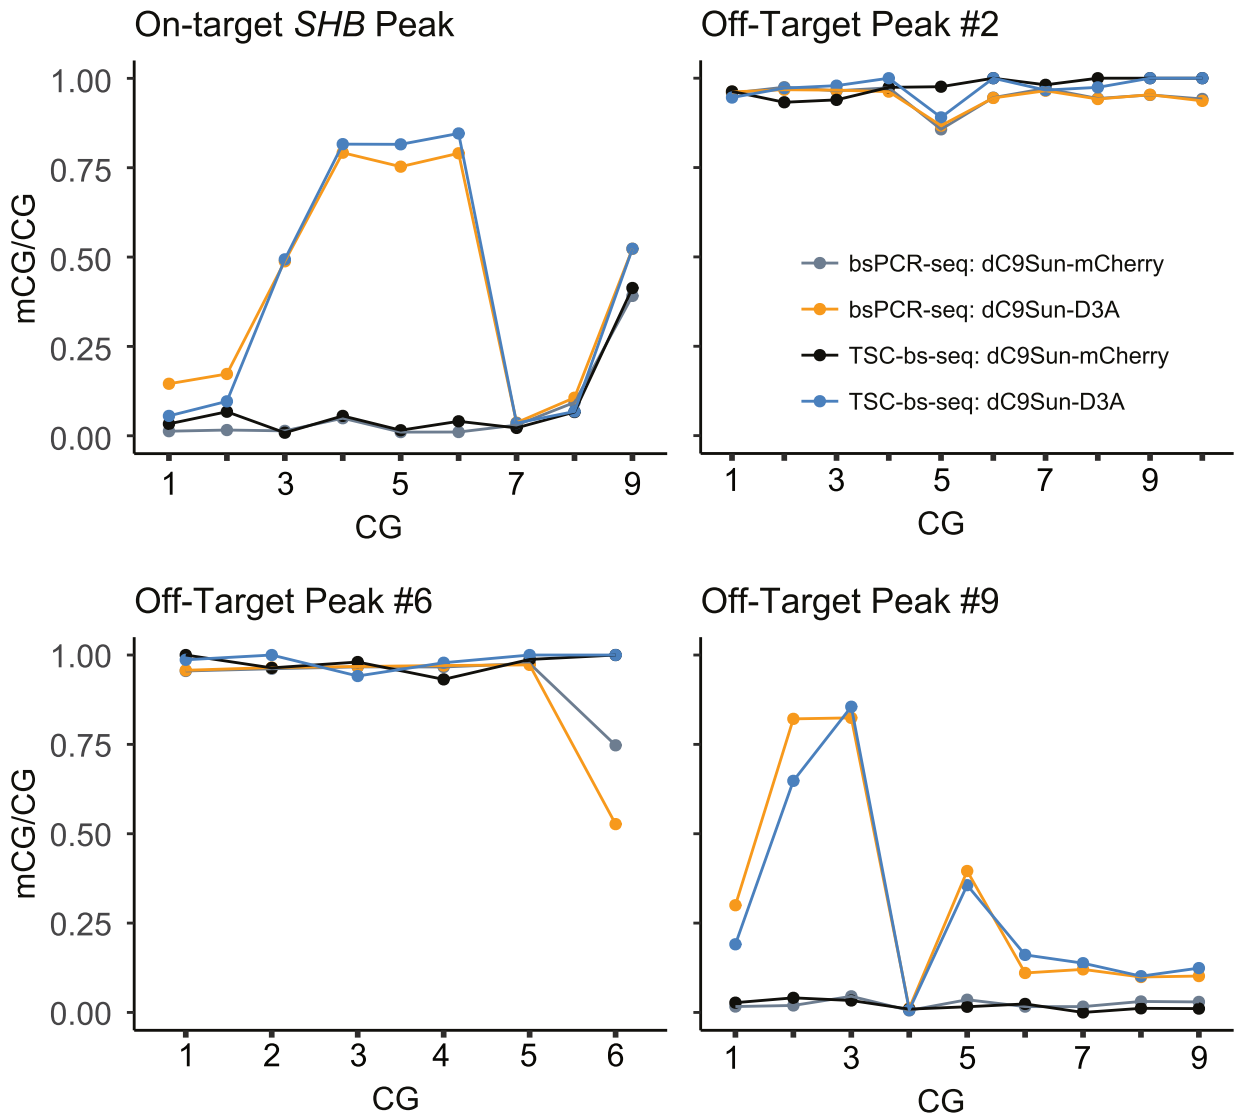

**Supplemental Figure S9: Comparison of mCG values obtained by bsPCR-seq to TSC-bs-seq**  
 Comparison of bsPCR-seq to Illumina TruSeq Methyl Capture EPIC for CGs covered in both assays (combined triplicates, mCG/CG values,  $\geq 50\times$  coverage for bsPCR-seq,  $\geq 5\times$  coverage for Illumina TruSeq Methyl Capture EPIC, TSC-bs-seq).
