# Supplementary material for: A modular dCas9-SunTag DNMT3A epigenome editing system overcomes pervasive off-target activity of direct fusion dCas9-DNMT3A constructs
Source: PubMed Central journal article supplement — Genome Res. 2018 Aug;28(8):1193–206. doi: 10.1101/gr.233049.117 (PMC6071642; doi:10.1101/gr.233049.117), 2018-08
Supplement: supp_gr.233049.117_Supplemental_Fig_S11.pdf [file supp_gr.233049.117_Supplemental_Fig_S11.pdf]

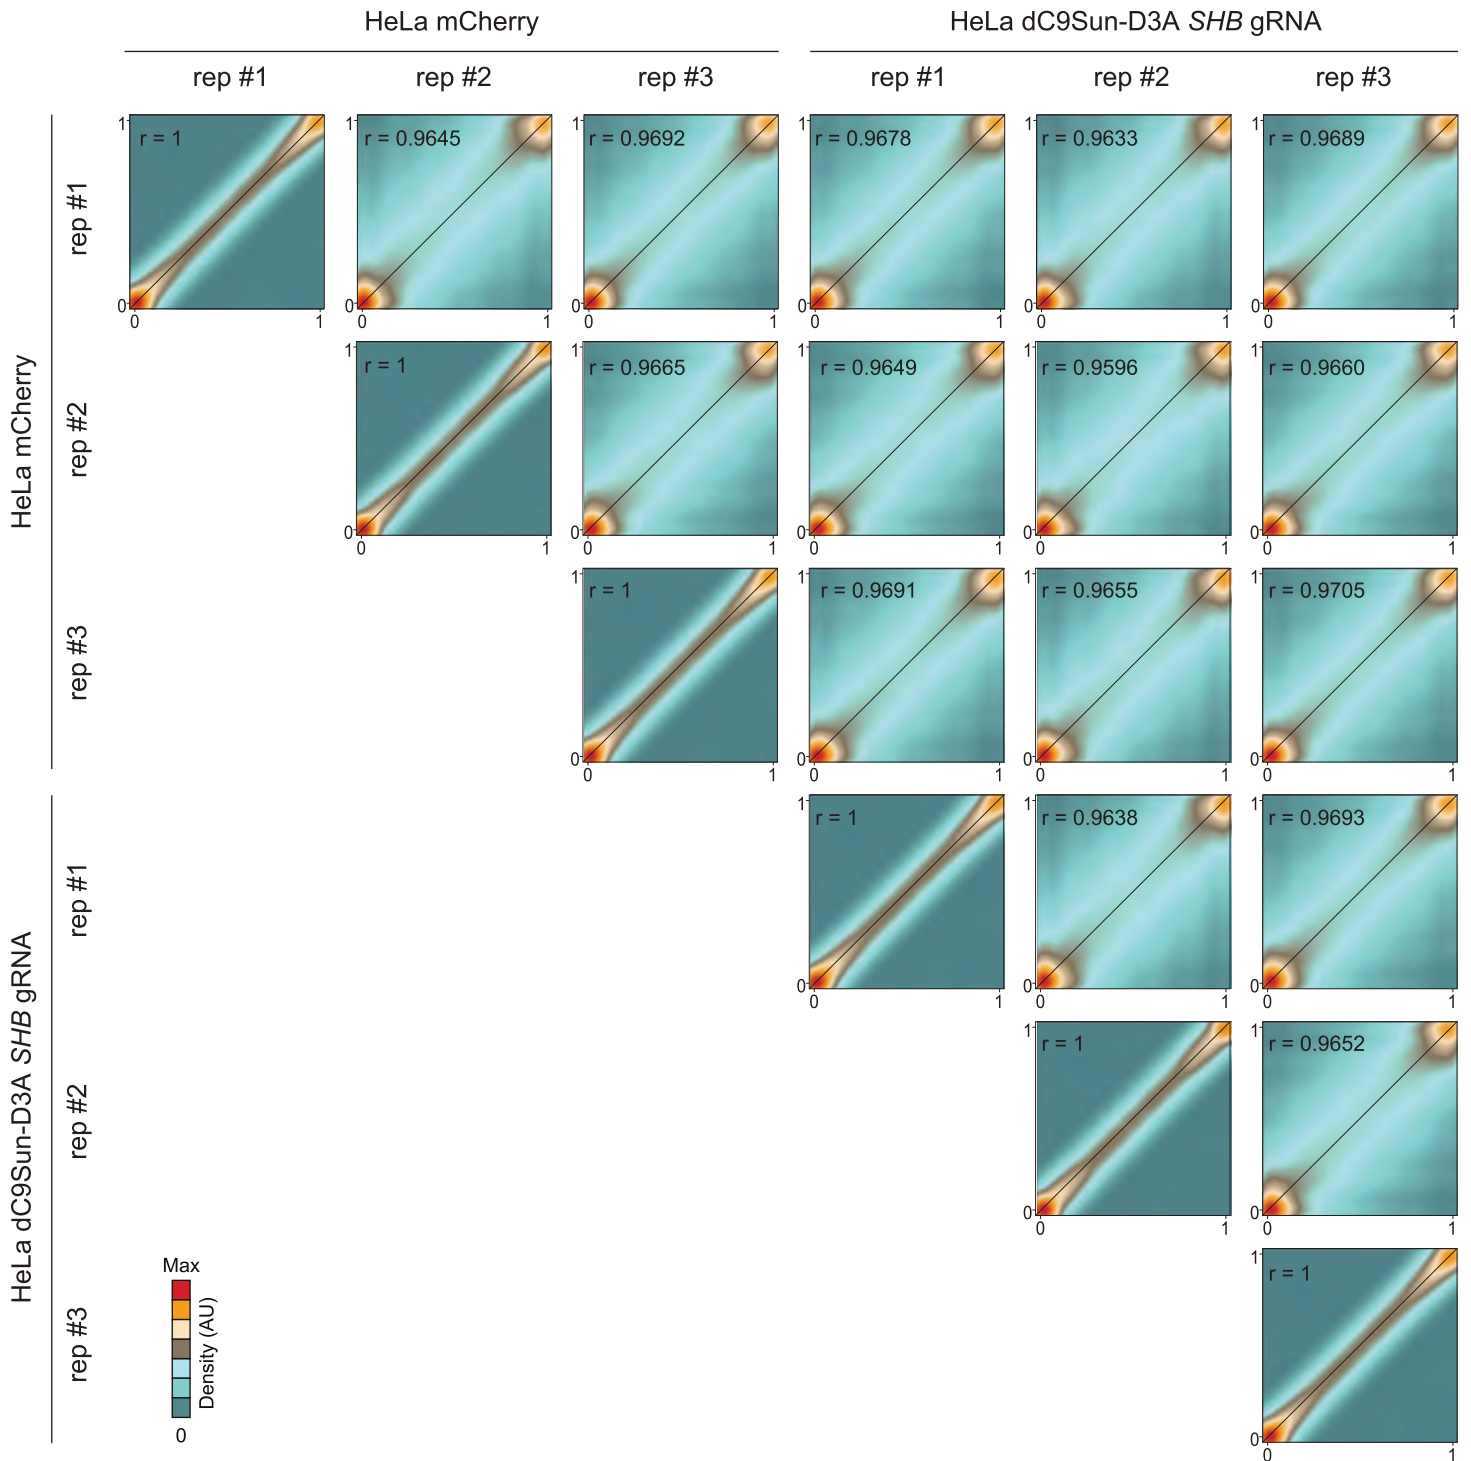

**Supplemental Figure S11: Flow cytometry sorted HeLa cell mCG value correlation between treatment and control, as well as replicates**

Pairwise correlation of all replicates per CG sites ( $> 2.6 \times 10^6$ ,  $\geq 5 \times$  coverage) from Illumina TruSeq Methyl Capture EPIC pulldown pulldown experiment (TSC-bs-seq). The Pearson correlation coefficient is shown in top left corner of each plot.
