# Supplementary material for: A modular dCas9-SunTag DNMT3A epigenome editing system overcomes pervasive off-target activity of direct fusion dCas9-DNMT3A constructs
Source: PubMed Central journal article supplement — Genome Res. 2018 Aug;28(8):1193–206. doi: 10.1101/gr.233049.117 (PMC6071642; doi:10.1101/gr.233049.117), 2018-08
Supplement: supp_gr.233049.117_Supplemental_Fig_S12.pdf [file supp_gr.233049.117_Supplemental_Fig_S12.pdf]

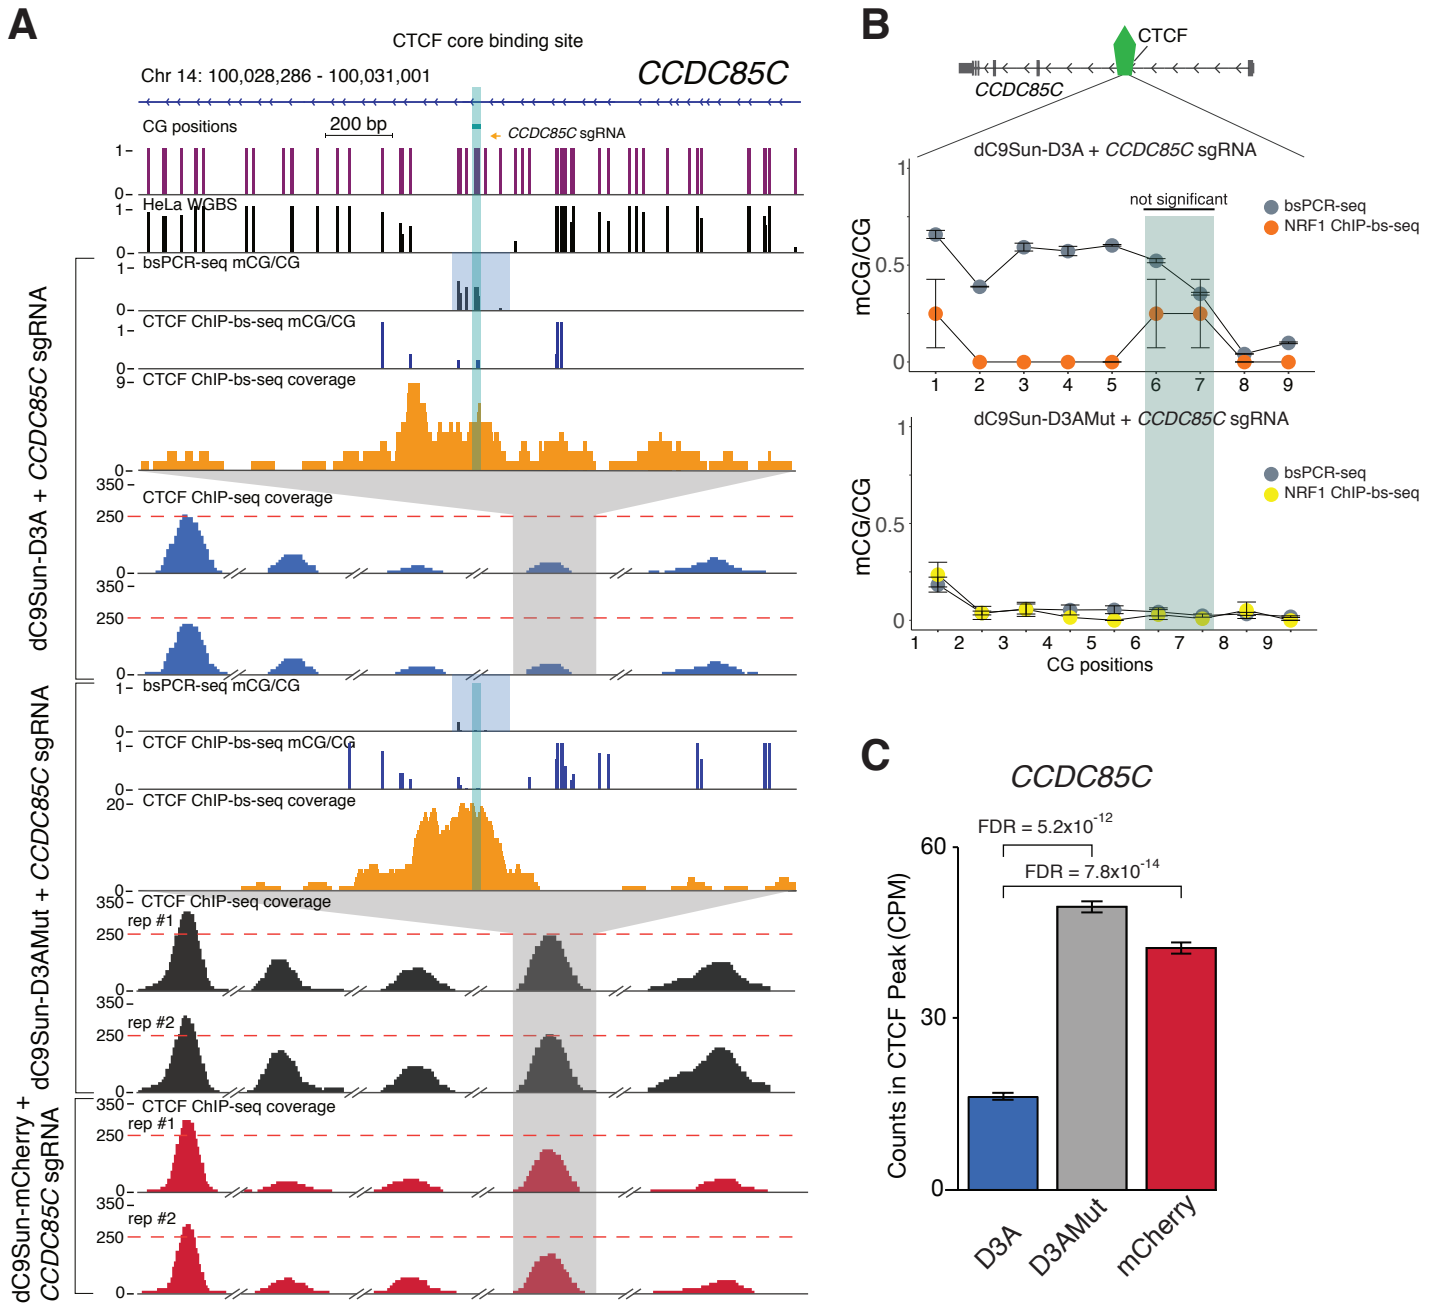

**Supplemental Figure S12: Reduced CTCF binding upon targeted methylation to core binding site**

(A) Genome browser display of the targeted CTCF binding site in a *CCDC85C* intron. Sets of experiments include (from top to bottom): bsPCR-seq (mCG/CG), CTCF-ChIP-bs-seq (mCG/CG), CTCF-ChIP-bs-seq coverage and CTCF ChIP-seq coverage. The CTCF core binding site is highlighted in green. (B) Quantitation of mCG/CG in the CTCF core binding site (green shaded region) and adjacent to core binding site comparing targeted bsPCR-seq (gray circles) to ChIP-bs-seq (orange circles for  $\alpha$ GCN4-D3A and yellow circles for  $\alpha$ GCN4-D3AMut). (C) Quantitation of CTCF CPM normalized ChIP-seq peak at *CCDC85C* (replicates  $n=2$ , sd - error bars, statistic edgeR, Benjamini-Hochberg multiple test corrected p-values).
