# Supplementary material for: A modular dCas9-SunTag DNMT3A epigenome editing system overcomes pervasive off-target activity of direct fusion dCas9-DNMT3A constructs
Source: PubMed Central journal article supplement — Genome Res. 2018 Aug;28(8):1193–206. doi: 10.1101/gr.233049.117 (PMC6071642; doi:10.1101/gr.233049.117), 2018-08
Supplement: supp_gr.233049.117_Supplemental_Fig_S13.pdf [file supp_gr.233049.117_Supplemental_Fig_S13.pdf]

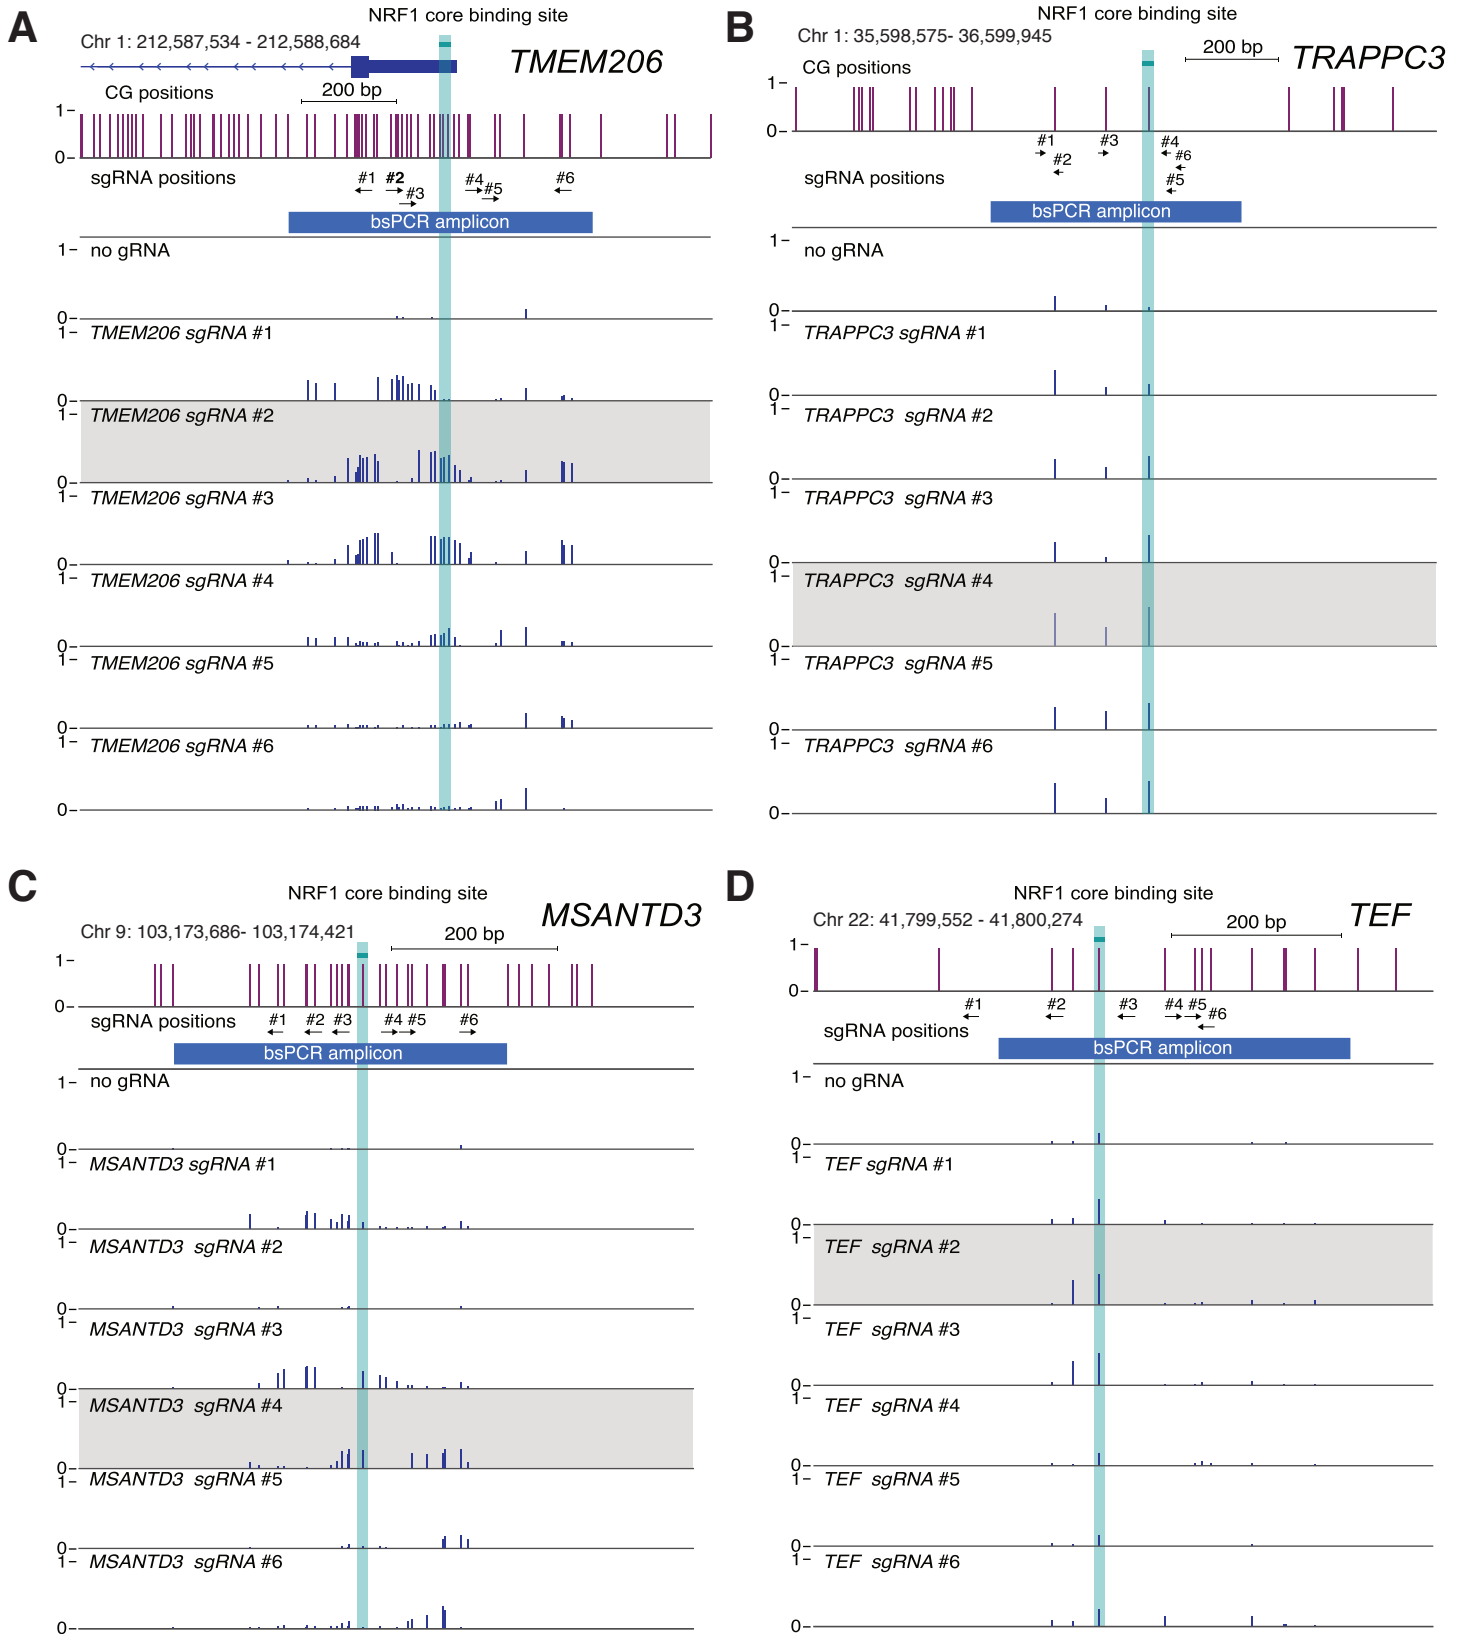

**Supplemental Figure S13: sgRNA placement effects on-target mCG deposition for NRF1 targets**

Genome Browser display for sgRNA selection for optimal targeted DNA methylation deposition at NRF1 core binding sites adjacent to (A) *TMEM206*, (B) *TRAPPC3*, (C) *MSANTD3* and (D) *TEF*. bsPCR-seq results shown as mCG/CG, gray highlight indicates optimal sgRNA.
