# Supplementary material for: A modular dCas9-SunTag DNMT3A epigenome editing system overcomes pervasive off-target activity of direct fusion dCas9-DNMT3A constructs
Source: HighWire-hosted journal article supplement (doi:10.1101/gr.233049.117), 2018-06-15
Supplement: Supplemental_Table_S2.xlsx [file Supplemental_Table_S2.xlsx]

## Sheet: Targeted-bsPCRseq
Table Sxxx. Primers pair used, related to the Experimental Procedures.
Primers for targeted bisulfite sequencing
Target	Primer	Sequence (5'-3')	Amplicon coordinates (hg19)	Related Figures
dCas9_Suntag_off-target_#1_watson	Forward	TTTTTTTGTGGTTTGATTTGGAGG	chr8:126424691-126424996	3A
	Reverse	TTCCCCAACAATATTTAAAATAAATCCAA		3A
dCas9_Suntag_off-target_#1_crick	Forward	AGTGTTTGGGGTAGATTTAAGGTTT	chr8:126424676-126424987	3A
	Reverse	CTTAAAATAACTATTCTTCCCTATAATTTAACCTA		3A
dCas9_Suntag_off-target_#2_watson	Forward	TGAAGTTTAGGAGTTTAGTTAGGATGGTG	chr1:1192422-1192752	3A
	Reverse	AAATCTCCAAAAACCCCTACTATAAC		3A
dCas9_Suntag_off-target_#2_crick	Forward	TGTAATATTAGGTAAGGTGTTTGGAGGG	chr1:1192299-1192598	3A
	Reverse	ACAACTCAAAAACAAAAAACAACCC		3A
dCas9_Suntag_off-target_#3_watson	Forward	GGGGTTTTGTTTTTTTATTGTTAGTTT	chr4:71553555-71553854	3A
	Reverse	TAATTTTCCTACTCCCTTATTTTCTCTTTTCTACT		3A
dCas9_Suntag_off-target_#3_crick	Forward	GTAGTTTTTTTGTTTTTTTGTTTTTTTT	chr4:71553556-71553855	3A
	Reverse	AAACTCTACCTTCCCACTATCAACCTC		3A
dCas9_Suntag_off-target_#4_watson	Forward	TTTTGTTTTGTTTTTTTGGGGTGTT	chr1:17915946-17916319	3A
	Reverse	ACATCTCCCACCAAACTAAATTTCTC		3A
dCas9_Suntag_off-target_#4_crick	Forward	ATTTTGGAGATATAAATTTTTGGAAGATTGTAGT	chr1:17915960-17916273	3A
	Reverse	CCTAAAATACCCCAAACTAAACAAAAAAAAC		3A
dCas9_Suntag_off-target_#5_watson	Forward	TGGTGTTATTGTTTGGAATTTTGTGTT	chr7:31889507-31889825	3A
	Reverse	AATAAAATCTCTTCTCATCCTCTCTAATTTC		3A
dCas9_Suntag_off-target_#5_crick	Forward	TTGAGATTTTGATGAGATTTTTTTT	chr7:31889492-31889835	3A
	Reverse	AAAATAACAATTAACTAATACTATTACCTAAAATT		3A
dCas9_Suntag_off-target_#6_watson	Forward	GGTTTGGGGTTTTTTATTGTTTAAGTG	chr1:45009057-45009356	3A
	Reverse	CATAATACAATATTTCCTATACACCCC		3A
dCas9_Suntag_off-target_#6_crick	Forward	GGTTTGTTTTTGTTTTTTTTATTTTTTTT	chr1:45008950-45009259	3A
	Reverse	TACCCAATAACACCTACAAATTAACTAATATTATT		3A
dCas9_Suntag_off-target_#7_watson	Forward	TTTTTGGATTTAGTTGAGTATTTTTT	chr21:37012993-37013329	3A
	Reverse	ATAATAAACTTCATCACATACACTTAAAC		3A
dCas9_Suntag_off-target_#7_crick	Forward	TTTATAATTAAGGTTAAGTTATATTTTGAGATTTT	chr21:37012964-37013299	3A
	Reverse	TTATTAAAAAACAATTATATTAAATCTCTTTCCTA		3A
dCas9_Suntag_off-target_#8_watson	Forward	AATTTTGTTTGGTTGTTGGATGTATG	chr14:74888355-74888712	3A
	Reverse	ATCAACAATTTTCACCCTTATCAACC		3A
dCas9_Suntag_off-target_#8_crick	Forward	AAGGAGAGGTTAGTTTGGTTTATGGG	chr14:74888345-74888650	3A
	Reverse	AAAAAATAAAAATTCTACCTAACTACTAAATATAT		3A
dCas9_Suntag_off-target_#9_watson	Forward	TTATAATTAGGGTGATTAATTAGGATATT	chr9:90328467-90328827	3A
	Reverse	AAACAACCCATAACCAAAAAAAACC		3A
dCas9_Suntag_off-target_#9_crick	Forward	GGATTGAAGTTGTTGATTTGTGTTTA	chr9:90328498-90328792	3A
	Reverse	AAAAAATTTCTTCCTCTCTACCTCACC		3A
dCas9_Suntag_off-target_#10_watson	Forward	TGTAGGATTTGGGAGGAATTTGAGT	chr17:76264451-76264815	3A
	Reverse	CACAACCCTCCCTACAAAAAAAATC		3A
dCas9_Suntag_off-target_#10_crick	Forward	TTTGTAAGGGAAATTAGGGTAAGGG	chr17:76264417-76264805	3A
	Reverse	TTTACAAAAAAACCCCAAAACCAAC		3A
GAD1_intron_1_watson	Forward	ATGGATGTATTAGAAAATTGGGGT	chr2:171678624-171678773	S2B
	Reverse	AAAAAATCAAACCCATAAACC		S2B
GAD1_intron_2_watson	Forward	TATATTTGAAGTTAGGAGTAGGAAGGG	chr2:171678379-171678682	S2B
	Reverse	CCCCAATAAATCCTATCACTTAC		S2B
GAD1_intron_3_watson	Forward	GGGTTTATGGGTTTGATTTTTTAAT	chr2:171678752-171679083	S2B
	Reverse	CCTTTAATCTACTCTCCAACAAACC		S2B
GAD1_intron_4_watson	Forward	TTTGTTGGAGAGTAGATTAAAGG	chr2:171679061-171679230	S2B
	Reverse	TTATAACATCTCAAAACAAAACCCC		S2B
GAD1_intron_5_crick	Forward	GTTTTTGGTTTGTTTTTTAGTAAGTTAGAT	chr2:171678813-171679084	S2B
	Reverse	CTACAAACCCTAACCCTCCTCTAC		S2B
GAD1_intron_6_crick	Forward	TTGGTTGTTTTGGTTGTAAT	chr2:171678452-171678799	S2B
	Reverse	ACTCCTAACTCCTTTCAAAAAAT		S2B
GAD1_intron_7_crick	Forward	AAGTTTTAAAGAAAGAAATTTGAA	chr2:171679042-171679258	S2B
	Reverse	AAAAAATAAACTAATCTAACTTACTAAAAA		S2B
GRHL2_promoter_1_watson	Forward	GGTGGAGGGGAAGGATTAGTTTTAATATAA	chr8:102506487-102506720	S2B
	Reverse	AATATTCTCAAACAACCACACACTCTCCT		S2B
GRHL2_promoter_2_watson	Forward	TATATTTTTTTAGTTTTTAAGGAAATA	chr8:102506734-102506998	S2B
	Reverse	AATAATAAACACATTATTCTTATTACTACT		S2B
DLG5_enhancer_1_watson	Forward	TATGGAATTTAAGGTTGGTTTTATAAGTGT	chr10:79625269-79625537	S2B
	Reverse	AATTTTCATCAACTAAACACACACAACTTC		S2B
DLG5_enhancer_2_watson	Forward	TTTTTAGGTAGATTTATTAGGTAGGGT	chr10:79625431-79625726	S2B
	Reverse	TAAAAAAACAATAACAAATTATATTCAACA		S2B
DACH1_promoter_1_Watson	Forward	TTTTAGTATAAAGTTAAGGATGAAGGTGAA	chr13:72441245-72441816	2C,S1,3A,3B,3C
	Reverse	AAAAATAAATCCTAAATCCTAAAAAAAA		2C,S1,3A,3B,3C
DACH1_promoter_2_Watson	Forward	AAATGAGTTGAAAAGTGTAGGTTGT	chr13:72441352-72441661	2C,S1,3A,3B,3C
	Reverse	AAAATAAATAATCTCCCTCTCCTTTTCC		2C,S1,3A,3B,3C
DACH1_promoter_3_Watson	Forward	GAAAAGGAGAGGGAGATTATTTATTTT	chr13:72441634-72442000	2C,S1,3A,3B,3C
	Reverse	CACTTAAAAACTATCCTAAAATTTTCACTA		2C,S1,3A,3B,3C
DACH1_promoter_4_Crick	Forward	TGTTTATATGTGAATTTTTTTTAAAATAAT	chr13:72441906-72441650	2C,S1,3A,3B,3C
	Reverse	TCATCTACTTCTCTTCTACTACTACC		2C,S1,3A,3B,3C
DACH1_promoter_5_Crick	Forward	GGTAGTAGTAGAAGAGAAGTAGATGATTTT	chr13:72441676-72441304	2C,S1,3A,3B,3C
	Reverse	CCCTAACAAATACATTAATCAAAAATTAAA		2C,S1,3A,3B,3C
DACH1_promoter_6_Watson	Forward	AATTTTATTTTGAATTTTTGTTTTTG	chr13:72438758-72439121	2C,S1,3A,3B,3C
	Reverse	TTCTCTCCAAAATATATTTTCTTTCTATCT		2C,S1,3A,3B,3C
DACH1_promoter_7_Watson	Forward	GGGGAGAAAAGGAGGTGAAGGTAATA	chr13:72441056-72441310	2C,S1,3A,3B,3C
	Reverse	CCAAAAAAAACCCAAATCCTTCAAA		2C,S1,3A,3B,3C
DACH1_promoter_8_Crick	Forward	CACTACCATAATCACATATAAAAAAAA	chr13:72440898-72441321	2C,S1,3A,3B,3C
	Reverse	TAATGTATTTGTTAGGGAGAGTTTAAGTTT		2C,S1,3A,3B,3C
DACH1_promoter_9_Watson	Forward	AGAATTTTAATTATTTGAGTAAATGA	chr13:72438201-72438528	2C,S1,3A,3B,3C
	Reverse	AAAAAACTTCTTCTCTATTAATACCC		2C,S1,3A,3B,3C
DACH1_promoter_10_Watson	Forward	AGTATAAAATTGGTTTGGTTGGGGAT	chr13:72438918-72439198	2C,S1,3A,3B,3C
	Reverse	AACTAAACTAAAAAAATTAAAAAAAA		2C,S1,3A,3B,3C
DACH1_promoter_11_Watson	Forward	GTTGAGTATTTTAGTGTAAAGTGTGTATTT	chr13:72439014-72439259	2C,S1,3A,3B,3C
	Reverse	AAAACAACCAACAAATTTTCTTC		2C,S1,3A,3B,3C
DACH1_promoter_12_Crick	Forward	GGAAGTGTAGTAAGGAGATTAGAAGGATAT	chr13:72438593-72438165	2C,S1,3A,3B,3C
	Reverse	AAATTTTAAACAAATATTTTACATTCTACA		2C,S1,3A,3B,3C
DACH1_promoter_13_Crick	Forward	TTTAGAATAATGAGTGTAAAATGGTGGATT	chr13:72440354-72440086	2C,S1,3A,3B,3C
	Reverse	AAATCCTTCCTAAAAATAAATTTACAAC		2C,S1,3A,3B,3C
DACH1_promoter_14_Watson	Forward	TGTTATGGTTATATATAAGGGGAAATAGA	chr13:72440901-72441309	2C,S1,3A,3B,3C
	Reverse	CAAAAAAAACCCAAATCCTTCAAAC		2C,S1,3A,3B,3C
DACH1_promoter_15_Crick	Forward	GTTGTAAATTTATTTTTAGGAAGGATTT	chr13:72440114-72439714	2C,S1,3A,3B,3C
	Reverse	CAAAAAACTATAACTCCAACAAAAAC		2C,S1,3A,3B,3C
DACH1_promoter_16_Crick	Forward	AAAAAAAATTACCACACACCCCC	chr13:72440945-72441321	2C,S1,3A,3B,3C
	Reverse	TAATGTATTTGTTAGGGAGAGTTTAAGTTT		2C,S1,3A,3B,3C
DACH1_promoter_17_Watson	Forward	GTTTTTTTGGTTTTTTTGTTATATTTTTTTTTTATTTAAG	chr13:72438565-72438944	2C,S1,3A,3B,3C
	Reverse	ATCCCCAACCAAACCAATTTTATACTAATA		2C,S1,3A,3B,3C
DACH1_promoter_18_Watson	Forward	GTAGGGGGTTGTGGTTTTAGTAAAGG	chr13:72439713-72440111	2C,S1,3A,3B,3C
	Reverse	ACAAACTCATCTCCAAAAAAAACTTC		2C,S1,3A,3B,3C
DACH1_promoter_19_Watson	Forward	GAAGAAAATTTGTTGGTTGTTTT	chr13:72439236-72439657	2C,S1,3A,3B,3C
	Reverse	CTCCCCAAAACCTAAATTCCAC		2C,S1,3A,3B,3C
DACH1_promoter_20_Crick	Forward	TGATATTTTGTGTTTTGGTTTTTTTAGTTT	chr13:72439009-72438556	2C,S1,3A,3B,3C
	Reverse	CAACCCAATATCCTTCTAATCTCCTTACTA		2C,S1,3A,3B,3C
DACH1_promoter_21_Crick	Forward	ATTTAATGGAAGTTGAATTGGAGAGATTAG	chr13:72439208-72438988	2C,S1,3A,3B,3C
	Reverse	AAACCAAAACACAAAATATCAAAACC		2C,S1,3A,3B,3C
DACH1_promoter_22_Crick	Forward	GTTTTTTAGGATTTGGGTTTTA	chr13:72439658-72439180	2C,S1,3A,3B,3C
	Reverse	AATCTCTCCAATTCAACTTCCATTAAATCT		2C,S1,3A,3B,3C
BCL3_enhancer_1_Watson	Forward	TGATAGAATTGGGATTGGAATTTAAATAAT	chr19:45244936-45245321	2C,S1,3A,3B,3C
	Reverse	AACAAAATCAACCCATCTAAAACCTAAAC		2C,S1,3A,3B,3C
BCL3_enhancer_2_Crick	Forward	TTTGGTAGTTTTGGGAGTTTTTGGTATT	chr19:45245350-45244957	2C,S1,3A,3B,3C
	Reverse	CCAAACAATTAAACAAAACCCCATTC		2C,S1,3A,3B,3C
BCL3_enhancer_3_Crick	Forward	TGGTAGAGTAAGATTTTGTTTTAAATAAAA	chr19:45245671-45245327	2C,S1,3A,3B,3C
	Reverse	CAAAAACTCCCAAAACTACCAAAACTC		2C,S1,3A,3B,3C
BCL3_enhancer_4_Watson	Forward	AAGGTTTTAGGGTGGGGAGGAATTA	chr19:45245347-45245666	2C,S1,3A,3B,3C
	Reverse	AAACAAAACCCTATCTCAAACAAAAA		2C,S1,3A,3B,3C
BCL3_promoter_1_Watson	Forward	TTTTTTTAGATTTATAGTTGATGAGGTA	chr19:45251206-45251685	2C,S1,3A,3B,3C
	Reverse	TATCCCCACCCCTACTACCAAAAAC		2C,S1,3A,3B,3C
BCL3_promoter_2_Watson	Forward	TGAGAGGTAGAGAGATGGTGATAGATATAA	chr19:45251462-45251873	2C,S1,3A,3B,3C
	Reverse	CCCCAAAAATTTCCTAAACCC		2C,S1,3A,3B,3C
BCL3_promoter_3_Crick	Forward	TTTTTTTTAGTGGGAGTGAAGAGA	chr19:45251341-45250865	2C,S1,3A,3B,3C
	Reverse	TCCCATCTCCAACCTAAATCATACC		2C,S1,3A,3B,3C
BCL3_promoter_4_Crick	Forward	TGATTTTATGTTTTGTGTGGATTTTATT	chr19:45252358-45251935	2C,S1,3A,3B,3C
	Reverse	ACAAAAATCCCTTCAATTCAACC		2C,S1,3A,3B,3C
BCL3_promoter_5_Crick	Forward	GGTTGGGGGTATGATTTAGGTTGGAG	chr19:45250897-45250410	2C,S1,3A,3B,3C
	Reverse	CAACCACTTCTCACATCCTAAATTAAC		2C,S1,3A,3B,3C
BCL3_promoter_6_Watson	Forward	GGGGGAAGTTAAATTGTTTTT	chr19:44747694-44747896	2C,S1,3A,3B,3C
	Reverse	TTAAAAACCCTACCCCCAAC		2C,S1,3A,3B,3C
BCL3_promoter_7_Watson	Forward	GGGTTTAGGAAATTTTTGGG	chr19:44748595-44749097	2C,S1,3A,3B,3C
	Reverse	CCTATACTCTATATAAATCCCACCC		2C,S1,3A,3B,3C
BCL3_promoter_8_Watson	Forward	GGTTGGGTTTTTATTTTTTTATAGG	chr19:44753716-44753929	2C,S1,3A,3B,3C
	Reverse	AATCCCCAAACTACCAAACTACTC		2C,S1,3A,3B,3C
BCL3_promoter_9_Crick	Forward	AGGGAGAGGAAAGGAGGGGTGGGGG	chr19:45251740-45251317	2C,S1,3A,3B,3C
	Reverse	TCTCTTCACTCCCACTAAAAAAAA		2C,S1,3A,3B,3C
BCL3_promoter_10_Watson	Forward	GAAGGGAAGGGGTGAGGTTTTTT	chr19:45250383-45250583	2C,S1,3A,3B,3C
	Reverse	ACCTCCCTCTAATTATCTCCTACCCC		2C,S1,3A,3B,3C
BCL3_promoter_11_Watson	Forward	TAATTAGAGGGAGGTTAGGTAAGTTT	chr19:45250568-45250890	2C,S1,3A,3B,3C
	Reverse	AACATAACTCAAACTAAAAATAAAAAAAA		2C,S1,3A,3B,3C
BCL3_promoter_12_Crick	Forward	GGTTGAATTGAAGGGATTTTTGT	chr19:45251958-45251720	2C,S1,3A,3B,3C
	Reverse	ACCCCTCCTTTCCTCTCCCTC		2C,S1,3A,3B,3C
BCL3_promoter_13_Watson	Forward	GTTTTTTGTGTTTTTAAAGTTTTTTTT	chr19:45250678-45250833	2C,S1,3A,3B,3C
	Reverse	TCTCCTCCCCTCCTCTCCCTCTC		2C,S1,3A,3B,3C
UNC5C_promoter_1_Crick	Forward	TTTTTGTTTTATTGTAAAGGGGTTATA	chr4:96471133-96470711	2C,S1,3A,3B,3C
	Reverse	CCAAAAAACCAACTATAAATTTACCC		2C,S1,3A,3B,3C
UNC5C_promoter_2_Crick	Forward	CTCAATAAAAATCCTACTACCCCAAT	chr4:95548269-95548541	2C,S1,3A,3B,3C
	Reverse	TTTAATTTATTTTTTGAGATGGGTA		2C,S1,3A,3B,3C
UNC5C_promoter_3_Watson	Forward	GGTTTAGTGTGTTTAGAGATTTAGTGAAGA	chr4:96469401-96469750	2C,S1,3A,3B,3C
	Reverse	TTTCCCAACTAATCAAAAAACTTTAATTAT		2C,S1,3A,3B,3C
UNC5C_promoter_4_Crick	Forward	GTTATTTTTTAGAGGAGTTGTGTTG	chr4:96470652-96470142	2C,S1,3A,3B,3C
	Reverse	TCCACTTTCTCCAAAAACAAAAACC		2C,S1,3A,3B,3C
UNC5C_promoter_5_Watson	Forward	TAAAGTTTTTTGATTAGTTGGGAAAGT	chr4:95548574-95549022	2C,S1,3A,3B,3C
	Reverse	CCTTTTAACCCCTACCTTTAAAAAA		2C,S1,3A,3B,3C
UNC5C_promoter_6_Watson	Forward	TTGAGTAGGGTTAGGGTAGGTAGTA	chr4:95548762-95549065	2C,S1,3A,3B,3C
	Reverse	AAAAAAAACCTTCAAACTCCTCCT		2C,S1,3A,3B,3C
UNC5C_promoter_7_Crick	Forward	TTTAAAAATCCCTCTTTCCCAATAC	chr4:95549049-95549427	2C,S1,3A,3B,3C
	Reverse	TTTTAGGATGTGAATTTTTTTGGTTAT		2C,S1,3A,3B,3C
UNC5C_promoter_8_Watson	Forward	GTTTTATGTAAGTAAGGATTGTAGGGAGAT	chr4:96470675-96471018	2C,S1,3A,3B,3C
	Reverse	CCCCAACCAAAAAAAACTTCAATTC		2C,S1,3A,3B,3C
UNC5C_promoter_9_Crick	Forward	TGGGATTGGGATATTTGTTGTAAATGT	chr4:96469968-96469431	2C,S1,3A,3B,3C
	Reverse	TCCTACTACCCCAATCTTAACACAAC		2C,S1,3A,3B,3C
UNC5C_promoter_10_Watson	Forward	TAAAGGTAGGGGTTAAAAGGGGGAG	chr4:96470153-96470568	2C,S1,3A,3B,3C
	Reverse	TAAACCTCCTTAACCACCCAACAAC		2C,S1,3A,3B,3C
λ DNA_Watson	Forward	AGGAAGAGGATGGTGTAGTAATTAATAAGA	chrL:2560-2984	Bisulfite non-conversion rate assessment
	Reverse	AACAAAACTACATCCACACTTTCACTC
MIR152_Watson	Forward	GTTAGGGATTAGTTGGAAGAAGGAG	chr17:46114434-46114649	2C, 4A, 4B, 4C
	Reverse	ATACCACATAAACCAACCCAAATAC
MIR152_Crick	Forward	GGTGTAGAGGGAAGGTTTTTGTAATT	chr17:46114268-46114563
	Reverse	CAATCAATACATAACAAAACTTAAACCC
SHB_Watson	Forward	TTTTAGTGTTGGGTATTTTGGGTTT	chr9:38017418-38017649
	Reverse	ATCCCCCTTTATCTACCTAATAAATAACAA
SHB_Crick	Forward	TTTAGGGGAAGGGAAAATTTTTTTT	chr9:38017402-38017714
	Reverse	AACTCAAAACCTAAACCACAACCAC
CCDC85C_Watson	Forward	AAGGGTAGAGGGGGATTTTTTGTT	chr14:100029469-100029756
	Reverse	AAACCAATTTCCCAAATCTCCTACC
CCDC85C_Crick	Forward	AAGTTGTTTGTGTTTGTGGGTTTAGG	chr14:100029565-100029822
	Reverse	ACCAAACATCCTCCCTCCTACTTCT
TMEM206_Watson	Forward	GTATTTTTTGGTAGGATGTGGAG	chr1:212588060-212588378
	Reverse	ACTAACCCAAAATCACATACAAACCTC
TMEM206_Crick	Forward	TTTTAATAAAGAGAGGAAGTGAGAGA	chr1:212588094-212588434
	Reverse	AATCATAACACTAACCAAAACTTC

## Sheet: sgRNA and TALE
					hg19 coordinates
Target (Gene)	sgRNA / TALE targeting Sequence	Primer	Sequence (5'-3')	Related Figures	chr	start	stop	strand
DACH1 sgRNA	GATCAATGTACTTGCCAGGG	Forward	TTTCTTGGCTTTATATATCTTGTGGAAAGGACGAAACACCGATCAATGTACTTGCCA	1C, 2C,3A,3B,3C	chr13	72441305	72441324	-
		Reverse	GACTAGCCTTATTTTAACTTGCTATTTCTAGCTCTAAAACTGGCAAGTACATTGATC
UNC5C sgRNA	GTCCAGACTTCGGCGTGCGGCGG	Forward	TTTCTTGGCTTTATATATCTTGTGGAAAGGACGAAACACCGTCCAGACTTCGGCGTGCGG	1C, 2C,3A,3B,3C	chr4	96470338	96470360	-
		Reverse	GACTAGCCTTATTTTAACTTGCTATTTCTAGCTCTAAAACCCGCACGCCGAAGTCTGGAC
DACH1 TALE	TCACATTCCATTTCGTCCG	Forward	HD-NI-HD-NI-NG-NG-HD-HD-NI-NG-NG-NG-HD-NH-NG-HD-HD-NH	S1
		Reverse
UNC5C TALE	TCCGTCTCCATACGTGTGG	Forward	HD-HD-NH-NG-HD-NG-HD-HD-NI-NG-NI-HD-NH-NG-NH-NG-NH-NH	S1
		Reverse
TMEM206 sgRNA	GTGCTGCGTCCGTGCGCCGCGG	Forward	TTTCTTGGCTTTATATATCTTGTGGAAAGGACGAAACACCGTGCTGCGTCCGTGCGCCG		chr1	212588141	212588162	-
		Reverse	TTTCTTGGCTTTATATATCTTGTGGAAAGGACGAAACACCGGACCTACCGGCTCCGCG
SHB sgRNA	CTGTGTGCTAAACCTCCCGTTGG	Forward	TTTCTTGGCTTTATATATCTTGTGGAAAGGACGAAACACCGTGTGCTAAACCTCCCGT		chr9	38017558	38017580	-
		Reverse	GACTAGCCTTATTTTAACTTGCTATTTCTAGCTCTAAAACACGGGAGGTTTAGCACAC
Mir152 sgRNA	ATACACTCCGACTCGGGCTCTGG	Forward	TTTCTTGGCTTTATATATCTTGTGGAAAGGACGAAACACCGCACTCCGACTCGGGCTC		chr17	46114566	46114588	-
		Reverse	GACTAGCCTTATTTTAACTTGCTATTTCTAGCTCTAAAACGAGCCCGAGTCGGAGTGC
CCDC85C sgRNA	TACAAAGGATGGAACGCGGCAGG	Forward	TTTCTTGGCTTTATATATCTTGTGGAAAGGACGAAACACCGAAAGGATGGAACGCGGC		chr14	100029619	100029641	-
		Reverse	GACTAGCCTTATTTTAACTTGCTATTTCTAGCTCTAAAACGCCGCGTTCCATCCTTTC
GAD1 sgRNA 1	GTTCGCTCCACTGGGTGTTGGG	Forward	TTTCTTGGCTTTATATATCTTGTGGAAAGGACGAAACACCGTTCGCTCCACTGGGTGTT	S2B	chr2	171678886	171678907	-
		Reverse	GACTAGCCTTATTTTAACTTGCTATTTCTAGCTCTAAAACAACACCCAGTGGAGCGAAC
GAD1 sgRNA 2	GCGACCTTTGGGACGCGCAGG	Forward	TTTCTTGGCTTTATATATCTTGTGGAAAGGACGAAACACCGCGACCTTTGGGACGCGC	S2B	chr2	171679017	171679037	-
		Reverse	GACTAGCCTTATTTTAACTTGCTATTTCTAGCTCTAAAACGCGCGTCCCAAAGGTCGC
GAD1 sgRNA 3	GTGAACTGATCTGGCTTGCTGG	Forward	TTTCTTGGCTTTATATATCTTGTGGAAAGGACGAAACACCGTGAACTGATCTGGCTTGC	S2B	chr2	171679047	171679068	+
		Reverse	GACTAGCCTTATTTTAACTTGCTATTTCTAGCTCTAAAACGCAAGCCAGATCAGTTCAC
Note: PAM sites for sgRNAs are underlined, while the initial "T" required for TALE binding is highlighted in red
Iiterative capped assembly monomers for TALE; NI = 'A', NG ='T', NH = 'G' , HD ='C'.

## Sheet: off-Target_bsPCR_amplicons.bed
chr8	126424691	126424996	Off_Target_Peak_#1_bsPCR_amplicon
chr8	126424676	126424987	Off_Target_Peak_#1_bsPCR_amplicon
chr1	1192422	1192752	Off_Target_Peak_#2_bsPCR_amplicon
chr1	1192299	1192598	Off_Target_Peak_#2_bsPCR_amplicon
chr4	71553555	71553854	Off_Target_Peak_#3_bsPCR_amplicon
chr4	71553556	71553855	Off_Target_Peak_#3_bsPCR_amplicon
chr1	17915946	17916319	Off_Target_Peak_#4_bsPCR_amplicon
chr1	17915960	17916273	Off_Target_Peak_#4_bsPCR_amplicon
chr7	31889507	31889825	Off_Target_Peak_#5_bsPCR_amplicon
chr7	31889492	31889835	Off_Target_Peak_#5_bsPCR_amplicon
chr1	45009057	45009356	Off_Target_Peak_#6_bsPCR_amplicon
chr1	45008950	45009259	Off_Target_Peak_#6_bsPCR_amplicon
chr21	37012993	37013329	Off_Target_Peak_#7_bsPCR_amplicon
chr21	37012964	37013299	Off_Target_Peak_#7_bsPCR_amplicon
chr14	74888355	74888712	Off_Target_Peak_#8_bsPCR_amplicon
chr14	74888345	74888650	Off_Target_Peak_#8_bsPCR_amplicon
chr9	90328467	90328827	Off_Target_Peak_#9_bsPCR_amplicon
chr9	90328498	90328792	Off_Target_Peak_#9_bsPCR_amplicon
chr17	76264451	76264815	Off_Target_Peak_#10_bsPCR_amplicon
chr17	76264417	76264805	Off_Target_Peak_#10_bsPCR_amplicon

## Sheet: qPCR primers
Primer 1	Sequence	Primer 2	Sequence	Template	Size
TOL160_RPS18_qPCR_F	CCAACATCGATGGGCGGCGGA	TOL161_RPS18_qPCR_R	CTCCCGCCCTCTTGGTGAGGT	RPS18	120 bp
TOL277_HSPC3_qPCR3_F	GGCACCCAGATAACTTCCAGA	TOL278_HSPC3_qPCR3_R	GGCTCTCTGCATCCAAAGGATC	HSPC3	147 bp
TOL283_GAPDH_qPCR4_F	GTATCGTGGAAGGACTCATG	TOL284_GAPDH_qPCR4_R	CAGTAGAGGCAGGGATGAT	GAPDH	129 bp
TOL314_TMEM206_qPCR2_F	GTGGTCTTTGAATGGAAAGATCC	TOL315_TMEM206_qPCR2_R	CAGTTTGGCAAACTCTGCTG	TMEM206	132 bp
